# Supplementary material for: Occurrence of Rickettsia spp., Hantaviridae, Bartonella spp. and Leptospira spp. in European Moles (Talpa europaea) from the Netherlands
Source: MDPI journal article supplement (doi:10.3390/microorganisms11010041), 2022-12-22
Supplement: s1 [file s1]

## Supplementary material for research article:

### Occurrence of *Rickettsia* spp., *Hantaviridae*, *Bartonella* spp. and *Leptospira* spp. in European moles (*Talpa europaea*) from the Netherlands

**Table S1:** Primers used in this study

| Pathogen                              | Target gene | Primer | Primer sequence (5'-3')                | Reference              | Tissue used for detection |
|---------------------------------------|-------------|--------|----------------------------------------|------------------------|---------------------------|
| <i>Hantaviridae</i>                   | L-segment   | F1     | ATGTAYGTBAGTGCWGATGC                   | Klempa et al. (2006)   | Lung                      |
|                                       |             | R1     | AACCADTCWGTYCCRTCAT                    |                        |                           |
|                                       |             | F2     | TGCWGATGCHACIAARTGGTC                  |                        |                           |
|                                       |             | R2     | GCRTCRTCWGARTGRTGDGCAA                 |                        |                           |
| <i>Leptospira</i> spp.                | secY        | F      | GCGATTCAGTTTAATCCTGC                   | Ahmed et al. (2009)    | Kidney                    |
|                                       |             | R      | GAGTTAGAGCTCAAATCTAAG                  |                        |                           |
| <i>Bartonella</i> spp. (detection)    | ssra        | F      | GCTATGGTAATAAATGGACAATGAAATAA          | Diaz et al. (2012)     | Spleen                    |
|                                       |             | R      | GCTTCTGTTGCCAGGTG                      |                        |                           |
|                                       |             | Probe  | ACCCCGCTTAAACCTGCGACG                  |                        |                           |
| <i>Bartonella</i> spp. (sequencing)   | gltA        | F      | GGGGACCAGCTCATGGTGG                    | Norman et al. (1995)   | Spleen                    |
|                                       |             | R      | ATTGCAAAAGAACAGTAAACA                  |                        |                           |
| Spotted fever group <i>Rickettsia</i> | Rstenos     | F      | TCGCAAATGTTACGGTACTTT                  | Stenos et al. (2005)   | Spleen                    |
|                                       |             | R      | TCGTGCATTTCTTTCCATTGTG                 |                        |                           |
|                                       |             | Probe  | TGCAATAGCAAGAACCGTAGGCTGGATG           |                        |                           |
| <i>Anaplasma phagocytophilum</i>      | Msp2        | F      | ATGGAAGGTAGTGTTGGTTATGGTATT            | Courtney et al. (2004) | Spleen                    |
|                                       |             | R      | TTGGTCTTGAAGCGCTCGTA                   |                        |                           |
|                                       |             | Probe  | TGGTGCCAGGGTTGAGCTTGAGATTG             |                        |                           |
| <i>Babesia</i> spp.                   | 18S         | F      | CAGCTTGACGGTAGGGTATTGG                 | Øines et al. (2012)    | Spleen                    |
|                                       |             | R      | TCGAACCCTAATTCCCCGTTA                  |                        |                           |
|                                       |             | Probe  | CGAGGCAGCAACGG                         |                        |                           |
| <i>Babesia microti</i>                | ITS         | F      | CTCACACAACGATGAAGGACGCA                | Azagi et al. (2021)    | Spleen                    |
|                                       |             | R      | AACAGAGGCAGTGTGTACAATACATTGAGA         |                        |                           |
|                                       |             | Probe  | GCA+GAATTTAG+CAAAT+CAACAGG             |                        |                           |
| <i>Francisella tularensis</i>         | FopA        | F      | ATCTAGCAGGTCAAGCAACAGGT                | Versage et al. (2003)  | Spleen                    |
|                                       |             | R      | GTCAACACTTGCTTGAACATTTCTAGATA          |                        |                           |
|                                       |             | Probe  | CAAACCTTAAGACCACCACCCACATCCCAA         |                        |                           |
| <i>Borrelia burgdorferi</i>           | OspA        | F      | AATATTTATTGGGAATAGGTCTAA               | Heylen et al. (2013)   | Spleen                    |
|                                       |             | R      | CTTTGTCCTTTTCTTTRCTTACAAG              |                        |                           |
|                                       |             | Probe  | AAGCAAAAATGTTAGCAGCCTTGA               |                        |                           |
| <i>Borrelia miyamotoi</i>             | flagellin   | F      | AGAAGGTGCTCAAGCAG                      | Hovius et al. (2013)   | Spleen                    |
|                                       |             | R      | TCGATCTTTGAAAGTGACATAT                 |                        |                           |
|                                       |             | Probe  | AGCACAAACAGGAGGGAGTTCAAGC              |                        |                           |
| <i>Neoehrlichia mikurensis</i>        | groE        | F      | CCTTGAAAATATAGCAAGATCAGGTAG            | Jahfari et al. (2012)  | Spleen                    |
|                                       |             | R      | CCACCACGTAACCTATTTAGTACTAAAG           |                        |                           |
|                                       |             | Probe  | CCTCTACTAATTATTGCTGAAGATGTAGAAGGTGAAGC |                        |                           |
| <i>Spiroplasma</i> spp.               | rpoB        | F      | TGTTGGACCAACGAAGTTG                    | Krawczyk et al. (2020) | Spleen                    |
|                                       |             | R      | CCAACAATTGGTGTGTTGGGG                  |                        |                           |
|                                       |             | Probe  | GCTAACCGTGCTTAATGGG                    |                        |                           |

**Table S2:** Moles tested in this study

| Number  | Location | Sex | Weight (gram) | <i>Leptospira</i> spp.        | <i>Bartonella</i> spp. | <i>Hantaviridae</i> * | Spotted fever group <i>Rickettsia</i> |
|---------|----------|-----|---------------|-------------------------------|------------------------|-----------------------|---------------------------------------|
| 18-2292 | Urk      | F   | 93            | -                             | -                      | -                     | -                                     |
| 18-2293 | Urk      | M   | 127           | -                             | -                      | +                     | -                                     |
| 18-2294 | Urk      | F   | 77            | -                             | -                      | -                     | -                                     |
| 18-2295 | Urk      | M   | 121           | -                             | -                      | -                     | -                                     |
| 18-2296 | Urk      | F   | 103           | -                             | +                      | -                     | -                                     |
| 18-2297 | Urk      | F   | 106           | <i>Leptospira interrogans</i> | -                      | -                     | -                                     |
| 18-2298 | Urk      | F   | 93            | -                             | -                      | +                     | -                                     |
| 18-2299 | Urk      | M   | 130           | -                             | -                      | -                     | -                                     |
| 18-2300 | Urk      | M   | 137           | -                             | +                      | +                     | -                                     |
| 18-2301 | Urk      | M   | 154           | -                             | -                      | -                     | -                                     |
| 18-2302 | Urk      | M   | 116           | -                             | +                      | +                     | -                                     |
| 18-2303 | Urk      | F   | 91            | -                             | -                      | +                     | -                                     |
| 18-2304 | Urk      | F   | 97            | -                             | +                      | +                     | -                                     |
| 18-2305 | Urk      | F   | 90            | -                             | -                      | -                     | -                                     |
| 18-2306 | Urk      | F   | 108           | -                             | -                      | +                     | -                                     |
| 18-2307 | Urk      | F   | 93            | -                             | -                      | +                     | -                                     |
| 18-2308 | Urk      | F   | 93            | -                             | -                      | -                     | -                                     |
| 18-2309 | Urk      | F   | 100           | -                             | -                      | -                     | -                                     |
| 18-2310 | Urk      | F   | 94            | -                             | +                      | +                     | -                                     |
| 18-2311 | Urk      | M   | 147           | -                             | -                      | +                     | -                                     |
| 18-2312 | Urk      | F   | 76            | -                             | -                      | -                     | -                                     |
| 18-2313 | Urk      | F   | 84            | -                             | -                      | -                     | -                                     |
| 18-2314 | Urk      | F   | 103           | -                             | -                      | -                     | -                                     |
| 18-2315 | Urk      | F   | 96            | -                             | -                      | -                     | -                                     |
| 18-2316 | Urk      | F   | 73            | <i>Leptospira kirschneri</i>  | -                      | -                     | -                                     |
| 18-2317 | Urk      | F   | 86            | -                             | -                      | +                     | -                                     |
| 18-2318 | Urk      | F   | 99            | -                             | -                      | +                     | -                                     |
| 18-2319 | Urk      | F   | 94            | -                             | -                      | +                     | -                                     |
| 18-2320 | Urk      | F   | 79            | -                             | -                      | +                     | -                                     |
| 18-2321 | Urk      | F   | 95            | -                             | -                      | +                     | -                                     |
| 18-2322 | Urk      | F   | 84            | -                             | -                      | +                     | -                                     |
| 18-2323 | Urk      | M   | 122           | -                             | +                      | +                     | -                                     |
| 18-2324 | Urk      | F   | 104           | -                             | +                      | +                     | -                                     |
| 18-2325 | Urk      | M   | 118           | -                             | -                      | -                     | -                                     |
| 18-2326 | Urk      | M   | 135           | -                             | -                      | -                     | -                                     |
| 18-2327 | Urk      | M   | 122           | -                             | -                      | -                     | -                                     |
| 18-2328 | Urk      | M   | 138           | -                             | -                      | -                     | -                                     |
| 18-2329 | Urk      | M   | 137           | -                             | -                      | -                     | -                                     |
| 18-2330 | Urk      | M   | 139           | -                             | -                      | +                     | -                                     |
| 18-2331 | Urk      | M   | 125           | -                             | +                      | -                     | -                                     |
| 18-2332 | Urk      | F   | 89            | -                             | +                      | -                     | -                                     |
| 18-2333 | Urk      | F   | 93            | -                             | -                      | -                     | -                                     |
| 18-2334 | Urk      | M   | 118           | -                             | +                      | +                     | -                                     |

|         |     |   |     |   |   |   |   |
|---------|-----|---|-----|---|---|---|---|
| 18-2335 | Urk | F | 87  | - | - | + | - |
| 18-2336 | Urk | F | 94  | - | + | + | - |
| 18-2337 | Urk | F | 87  | - | + | - | - |
| 18-2338 | Urk | F | 84  | - | - | + | - |
| 18-2339 | Urk | F | 89  | - | - | + | - |
| 18-2340 | Urk | F | 85  | - | + | + | - |
| 18-2341 | Urk | M | 129 | - | - | + | - |
| 18-2342 | Urk | M | 116 | - | - | + | - |
| 18-2343 | Urk | F | 82  | - | + | + | - |
| 18-2344 | Urk | F | 90  | - | - | - | - |
| 18-2345 | Urk | F | 86  | - | - | + | - |
| 18-2346 | Urk | F | 86  | - | + | + | - |
| 18-2347 | Urk | F | 90  | - | - | - | - |
| 18-2348 | Urk | M | 150 | - | - | - | - |
| 18-2349 | Urk | M | 143 | - | - | - | - |
| 18-2350 | Urk | M | 138 | - | - | - | - |
| 18-2351 | Urk | F | 103 | - | - | + | - |
| 18-2372 | Urk | F | 92  | - | - | + | - |
| 18-2373 | Urk | F | 84  | - | - | - | - |
| 18-2374 | Urk | F | 98  | - | - | - | - |
| 18-2375 | Urk | F | 98  | - | + | - | - |
| 18-2376 | Urk | M | 106 | - | - | + | - |
| 18-2377 | Urk | F | 91  | - | - | + | - |
| 18-2378 | Urk | F | 89  | - | - | - | - |
| 18-2379 | Urk | F | 98  | - | - | - | - |
| 18-2380 | Urk | M | 137 | - | - | - | - |
| 18-2381 | Urk | F | 87  | - | - | - | - |
| 18-2382 | Urk | M | 107 | - | - | - | - |
| 18-2383 | Urk | F | 96  | - | - | + | - |
| 18-2384 | Urk | F | 108 | - | - | - | - |
| 18-2385 | Urk | M | 129 | - | - | - | - |
| 18-2386 | Urk | M | 146 | - | - | + | - |
| 18-2387 | Urk | M | 140 | - | - | + | - |
| 18-2388 | Urk | M | 134 | - | + | + | - |
| 18-2389 | Urk | M | 160 | - | - | - | - |
| 18-2390 | Urk | F | 91  | - | + | - | - |
| 18-2421 | Urk | F | 89  | - | - | - | - |
| 18-2422 | Urk | F | 95  | - | - | - | - |
| 18-2423 | Urk | F | 87  | - | + | - | - |
| 18-2424 | Urk | F | 81  | - | - | + | - |
| 18-2425 | Urk | F | 83  | - | - | - | - |
| 18-2426 | Urk | F | 98  | - | - | - | - |
| 18-2427 | Urk | F | 95  | - | - | - | - |
| 18-2428 | Urk | F | 93  | - | - | - | - |
| 18-2429 | Urk | F | 81  | - | - | + | - |
| 18-2430 | Urk | M | 144 | - | - | + | - |
| 18-2431 | Urk | F | 99  | - | - | - | - |
| 18-2432 | Urk | F | 93  | - | + | - | - |
| 18-2433 | Urk | M | 113 | - | - | - | - |
| 18-2434 | Urk | M | 132 | - | + | + | - |

|         |                |   |     |                               |   |   |   |
|---------|----------------|---|-----|-------------------------------|---|---|---|
| 18-2435 | Urk            | F | 91  | -                             | - | + | - |
| 18-2436 | Urk            | F | 99  | -                             | + | + | - |
| 18-2437 | Urk            | M | 140 | -                             | + | - | - |
| 18-2438 | Urk            | M | 126 | -                             | - | - | - |
| 18-2439 | Urk            | M | 148 | -                             | + | - | - |
| 18-2440 | Urk            | M | 144 | -                             | - | + | - |
| 18-2441 | Urk            | F | 104 | -                             | + | - | - |
| 18-2442 | Urk            | F | 89  | -                             | - | - | - |
| 18-2443 | Urk            | F | 95  | -                             | - | - | - |
| 18-2444 | Urk            | M | 134 | -                             | + | - | - |
| 18-2445 | Urk            | M | 159 | -                             | - | - | - |
| 18-2446 | Urk            | M | 137 | -                             | - | + | - |
| 18-2496 | Urk            | F | 95  | -                             | + | - | - |
| 18-2497 | Urk            | F | 105 | -                             | + | + | - |
| 18-2498 | Urk            | F | 101 | -                             | - | + | - |
| 18-2499 | Urk            | M | 119 | -                             | + | + | - |
| 18-2500 | Urk            | M | 137 | <i>Leptospira interrogans</i> | + | + | - |
| 18-2501 | Urk            | F | 103 | -                             | + | + | - |
| 18-2502 | Urk            | M | 149 | -                             | - | + | - |
| 18-2503 | Urk            | M | 133 | -                             | + | + | - |
| 18-2504 | Urk            | M | 131 | -                             | + | + | - |
| 18-2505 | Urk            | F | 97  | -                             | + | + | - |
| 18-2506 | Urk            | F | 91  | -                             | - | - | - |
| 18-2507 | Urk            | M | 167 | -                             | + | - | - |
| 18-2508 | Urk            | F | 95  | -                             | + | + | - |
| 18-2509 | Urk            | F | 89  | -                             | + | + | - |
| 18-2510 | Urk            | F | 81  | -                             | + | + | - |
| 18-2511 | Urk            | F | 95  | -                             | - | - | - |
| 18-2512 | Urk            | F | 95  | -                             | + | + | - |
| 18-2513 | Urk            | M | 139 | -                             | + | - | - |
| 18-2514 | Urk            | F | 91  | -                             | + | + | - |
| 18-2515 | Urk            | F | 87  | -                             | + | - | - |
| 19-2693 | Bergen op Zoom | M | 120 | -                             | + | + | - |
| 19-2694 | Bergen op Zoom | M | 130 | -                             | + | + | - |
| 19-2695 | Bergen op Zoom | M | 88  | -                             | - | - | - |
| 19-2696 | Bergen op Zoom | F | 84  | -                             | + | + | - |
| 19-2697 | Bergen op Zoom | M | n.d | -                             | + | + | - |
| 19-2698 | Bergen op Zoom | M | n.d | -                             | - | - | - |
| 19-2699 | Bergen op Zoom | F | 102 | -                             | + | - | - |
| 19-2700 | Bergen op Zoom | F | 80  | -                             | + | - | - |
| 19-2701 | Bergen op Zoom | F | 74  | -                             | + | - | - |
| 19-2702 | Bergen op Zoom | M | 88  | -                             | + | - | - |
| 19-2703 | Bergen op Zoom | M | 114 | -                             | + | + | - |
| 19-2704 | Bergen op Zoom | F | 98  | -                             | + | + | - |
| 19-2705 | Bergen op Zoom | F | 86  | -                             | - | + | - |
| 19-2706 | Bergen op Zoom | F | 86  | -                             | - | - | - |
| 19-2707 | Bergen op Zoom | M | 122 | -                             | + | - | - |
| 19-2708 | Bergen op Zoom | M | 12  | -                             | + | - | - |
| 19-2709 | Bergen op Zoom | F | 74  | -                             | + | + | - |

|         |                |      |     |   |   |   |   |
|---------|----------------|------|-----|---|---|---|---|
| 19-2710 | Bergen op Zoom | M    | 110 | - | + | - | - |
| 19-2711 | Bergen op Zoom | F    | 78  | - | + | - | - |
| 19-2712 | Bergen op Zoom | M    | 122 | - | + | + | - |
| 19-2713 | Lage Zwaluwe   | F    | 86  | - | - | + | - |
| 19-2714 | Lage Zwaluwe   | F    | 86  | - | - | - | - |
| 19-2715 | Lage Zwaluwe   | M    | 110 | - | - | - | - |
| 19-2716 | Lage Zwaluwe   | F    | 70  | - | - | - | - |
| 19-2717 | Lage Zwaluwe   | M    | 122 | - | - | - | - |
| 19-2718 | Lage Zwaluwe   | M    | 128 | - | - | - | - |
| 19-2719 | Lage Zwaluwe   | M    | 130 | - | + | - | - |
| 19-2720 | Lage Zwaluwe   | M    | 104 | - | - | - | - |
| 19-2721 | Lage Zwaluwe   | M    | 82  | - | - | + | - |
| 19-2722 | Lage Zwaluwe   | F    | 78  | - | - | + | - |
| 19-2723 | Lage Zwaluwe   | M    | 128 | - | - | - | - |
| 19-2724 | Lage Zwaluwe   | M    | 88  | - | - | + | - |
| 19-2725 | Lage Zwaluwe   | F    | 92  | - | - | - | - |
| 19-2726 | Lage Zwaluwe   | F    | 88  | - | - | + | - |
| 19-2727 | Lage Zwaluwe   | F    | 102 | - | + | - | - |
| 19-2728 | Lage Zwaluwe   | M    | 122 | - | - | + | - |
| 19-2729 | Lage Zwaluwe   | M    | 102 | - | - | + | - |
| 19-2730 | Lage Zwaluwe   | M    | 106 | - | - | - | - |
| 19-2731 | Lage Zwaluwe   | M    | 126 | - | + | + | + |
| 19-2732 | Lage Zwaluwe   | n.d. | 104 | - | - | + | - |
| 19-2733 | Schimmert      | M    | 98  | - | + | - | - |
| 19-2734 | Schimmert      | M    | 114 | - | - | + | - |
| 19-2735 | Schimmert      | M    | 88  | - | + | - | - |
| 19-2736 | Gennep         | F    | 80  | - | + | + | - |
| 19-2737 | Gennep         | M    | 102 | - | - | - | - |
| 19-2738 | Gennep         | F    | 80  | - | + | + | - |
| 19-2739 | Gennep         | M    | 110 | - | + | + | - |
| 19-2740 | Gennep         | M    | 110 | - | - | - | - |
| 19-2741 | Gennep         | F    | 88  | - | - | + | - |
| 19-2742 | Gennep         | F    | 70  | - | + | - | - |
| 19-2743 | Gennep         | M    | 110 | - | - | - | - |
| 19-2744 | Gennep         | M    | 126 | - | - | - | - |
| 19-2745 | Gennep         | F    | 80  | - | + | + | - |
| 19-2746 | Gennep         | F    | 72  | - | - | - | - |
| 19-2747 | Gennep         | M    | 106 | - | + | + | - |

\* All detected hantaviruses concern NVAV, only the one animal in bold (19-2745) indicates the animal in which BRGV was detected.

## References

- Ahmed, A., Engelberts, M. F., Boer, K. R., Ahmed, N., & Hartskeerl, R. A. (2009). Development and validation of a real-time PCR for detection of pathogenic *Leptospira* species in clinical materials. *PLoS One*, 4(9), e7093. <https://doi.org/10.1371/journal.pone.0007093>
- Azagi, T., Jaarsma, R. I., Docters van Leeuwen, A., Fonville, M., Maas, M., Franssen, F. F. J., Kik, M., Rijks, J. M., Montizaan, M. G., Groenevelt, M., Hoyer, M., Esser, H. J., Krawczyk, A. I., Modrý, D., Sprong, H., & Demir, S. (2021). Circulation of *Babesia* Species and Their Exposure to Humans through *Ixodes Ricinus*. *Pathogens*, 10(4). <https://doi.org/10.3390/pathogens10040386>
- Courtney, J. W., Kostelnik, L. M., Zeidner, N. S., & Massung, R. F. (2004). Multiplex real-time PCR for detection of *Anaplasma phagocytophilum* and *Borrelia burgdorferi*. *J Clin Microbiol*, 42(7), 3164-3168. <https://doi.org/10.1128/jcm.42.7.3164-3168.2004>
- Diaz, M. H., Bai, Y., Malania, L., Winchell, J. M., & Kosoy, M. Y. (2012). Development of a novel genus-specific real-time PCR assay for detection and differentiation of *Bartonella* species and genotypes. *J Clin Microbiol*, 50(5), 1645-1649. <https://doi.org/10.1128/jcm.06621-11>
- Heylen, D., Tijssse, E., Fonville, M., Matthysen, E., & Sprong, H. (2013). Transmission dynamics of *Borrelia burgdorferi* s.l. in a bird tick community. *Environ Microbiol*, 15(2), 663-673. <https://doi.org/10.1111/1462-2920.12059>
- Hovius, J. W., de Wever, B., Sohne, M., Brouwer, M. C., Coumou, J., Wagemakers, A., Oei, A., Knol, H., Narasimhan, S., Hodiament, C. J., Jahfari, S., Pals, S. T., Horlings, H. M., Fikrig, E., Sprong, H., & van Oers, M. H. (2013). A case of meningoencephalitis by the relapsing fever spirochaete *Borrelia miyamotoi* in Europe. *Lancet*, 382(9892), 658. [https://doi.org/10.1016/s0140-6736\(13\)61644-x](https://doi.org/10.1016/s0140-6736(13)61644-x)
- Jahfari, S., Fonville, M., Hengeveld, P., Reusken, C., Scholte, E. J., Takken, W., Heyman, P., Medlock, J. M., Heylen, D., Kleve, J., & Sprong, H. (2012). Prevalence of *Neoehrlichia mikurensis* in ticks and rodents from North-west Europe. *Parasit Vectors*, 5, 74. <https://doi.org/10.1186/1756-3305-5-74>
- Klempa, B., Fichet-Calvet, E., Lecompte, E., Auste, B., Aniskin, V., Meisel, H., Denys, C., Koivogui, L., ter Meulen, J., & Krüger, D. H. (2006). Hantavirus in African wood mouse, Guinea. *Emerg Infect Dis*, 12(5), 838-840. <https://doi.org/10.3201/eid1205.051487>
- Krawczyk, A. I., van Duijvendijk, G. L. A., Swart, A., Heylen, D., Jaarsma, R. I., Jacobs, F. H. H., Fonville, M., Sprong, H., & Takken, W. (2020). Effect of rodent density on tick and tick-borne pathogen populations: consequences for infectious disease risk. *Parasit Vectors*, 13(1), 34. <https://doi.org/10.1186/s13071-020-3902-0>
- Norman, A. F., Regnery, R., Jameson, P., Greene, C., & Krause, D. C. (1995). Differentiation of *Bartonella*-like isolates at the species level by PCR-restriction fragment length polymorphism in the citrate synthase gene. *Journal of Clinical Microbiology*, 33(7), 1797-1803. <https://doi.org/doi:10.1128/jcm.33.7.1797-1803.1995>
- Øines, Ø., Radzijeuskaja, J., Paulauskas, A., & Rosef, O. (2012). Prevalence and diversity of *Babesia* spp. in questing *Ixodes ricinus* ticks from Norway. *Parasit Vectors*, 5, 156. <https://doi.org/10.1186/1756-3305-5-156>
- Stenos, J., Graves, S. R., & Unsworth, N. B. (2005). A highly sensitive and specific real-time PCR assay for the detection of spotted fever and typhus group Rickettsiae. *Am J Trop Med Hyg*, 73(6), 1083-1085.
- Versage, J. L., Severin, D. D., Chu, M. C., & Petersen, J. M. (2003). Development of a multitarget real-time TaqMan PCR assay for enhanced detection of *Francisella tularensis* in complex specimens. *J Clin Microbiol*, 41(12), 5492-5499. <https://doi.org/10.1128/jcm.41.12.5492-5499.2003>
